# Supplementary material
Source: MDPI journal article supplement (https://www.mdpi.com/2073-4395/13/2/612)
Supplement: s1 [file s1]

Archive with 2 entries (2 files):
- Additional file 2.pdf
- Additional file 1.xlsx
