# Supplementary material
Source: MDPI journal article supplement (https://www.mdpi.com/2073-4395/13/2/612)
Supplement: s1 [file s1 › Additional file 1.xlsx]

## Sheet: Table S1
Table S1. SAMS genes from other plant species analyzed in this study
Organism	No. of homologs	Homologs gene Ids
Arabidopsis thaliana	4	AT1G02500
		AT4G01850
		AT3G17390
		AT2G36880
Oryza Sativa (rice)	4	LOC_Os01g22010
		LOC_Os05g04510
		LOC_Os01g18860
		LOC_Os07g29440
Medicago truncatula	5	Medtr7g110310
		Medtr2g046710
		Medtr4g123810
		Medtr7g102120
		Medtr1g063060
Glycine max (soya bean)	12	Glyma.15G190500	Glyma.17G039100	Glyma.02G008700
		Glyma.19G220200	Glyma.10G144300	Glyma.19G184700
		Glyma.17G039000	Glyma.03G184000
		Glyma.07G233800	Glyma.10G054500
		Glyma.03G223000	Glyma.13G141600
Solanum lycopersicum (Tomato)	5	Solyc12g099000
		Solyc01g101060
		Solyc09g008280
		Solyc10g083970
		Solyc04g049200
Sorghum bicolor (sorghum)	3	Sobic.003G140000
		Sobic.009G033600
		Sobic.003G151600
Hordeum vulgare (Barley)	5	HORVU6Hr1G034650
		HORVU6Hr1G063540
		HORVU6Hr1G063570
		HORVU6Hr1G063560
		HORVU6Hr1G063490
Zea mays (Maize)	4	ZmPHJ40.08G161500
		ZmPHJ40.10G089400
		ZmPHJ40.03G082800
		ZmPHJ40.08G052100
Theobroma cacao	4	Thecc.01G322800
		Thecc.04G311300
		Thecc.05G328200
		Thecc.05G068700
Gossypium hirsutum	15	Gohir.A08G121100	Gohir.D07G135100	Gohir.D04G110400
		Gohir.D08G142400	Gohir.A11G106400	Gohir.A04G071900
		Gohir.D12G124900	Gohir.A02G057600	Gohir.A11G323900
		Gohir.A12G121100	Gohir.D02G063400	Gohir.D11G343000
		Gohir.D11G111300	Gohir.A09G145900	Gohir.D09G141700
Gossypium raimondii	8	Gorai.004G146800	Gorai.006G162700
		Gorai.008G135900	Gorai.009G414500
		Gorai.007G119200	Gorai.007G373100
		Gorai.001G146800
		Gorai.005G071300
Gossypium barbadense	16	Gobar.D08G152700	Gobar.A07G142100	Gobar.D11G382800
		Gobar.A08G132000	Gobar.A11G114200	Gobar.A04G089800
		Gobar.D12G139400	Gobar.A02G062600	Gobar.D09G159400
		Gobar.A12G129100	Gobar.D02G072700	Gobar.A11G355100
		Gobar.D11G116500	Gobar.A09G156000	Gobar.D04G126900
		Gobar.D07G145400
Gossypium mustelinum	17	Gomus.D08G152500	Gomus.A11G117700	Gomus.A04G096800
		Gomus.A08G137400	Gomus.A02G066400	Gomus.A11G364800
		Gomus.D12G141000	Gomus.D02G077500	Gomus.D11G392000
		Gomus.A12G131300	Gomus.A09G156800	Gomus.A07G143700
		Gomus.D11G120000	Gomus.D04G129800	Gomus.D04G129800
		Gomus.D07G149200	Gomus.D09G164900
Gossypium tomentosum	16	Gotom.A08G144300	Gotom.D07G152300	Gotom.A04G102500
		Gotom.D08G158400	Gotom.A11G120200	Gotom.A11G390000
		Gotom.D12G148000	Gotom.A02G070500	Gotom.D09G170900
		Gotom.A12G140900	Gotom.D02G082000	Gotom.D11G408300
		Gotom.D11G121300	Gotom.A09G173200
		Gotom.A07G151700	Gotom.D04G137700
Gossypium darwinii	16	Godar.D08G162400	Godar.A11G122000	Godar.D09G175400
		Godar.A08G144100	Godar.A02G070200	Godar.A11G389200
		Godar.A12G140000	Godar.D02G077900	Godar.D04G135100
		Godar.D12G148200	Godar.A09G177400	Godar.D07G154700
		Godar.D11G123100	Godar.A04G101900
		Godar.A07G151800	Godar.D11G402700

## Sheet: Table S2
Table S2. List of primers used for the RT-qPCR analysis
Gene ID	Forward primer Sequence (5'->3')	Reverse Primer (5` – 3`)
Gh_A12G1098	GCTGACCTCAAGGAGCATGT	TCTTACGTCCGGTGAGACCT
Gh_D12G1222	GCTGACCTCAAGGAGCATGT	TCCTTTCCGGAGAAAGCACC
Gh_D07G1294	TGACACGTGCCGCAACATT	TTGACCAGGACCTTGCAGTT
Gh_D02G0636	GGGGGCAATAGCAGGTTCTT	ACCTCCCAAGTGAAATCTGTGT
Gh_A02G0578	GGGGGCAATAGCAGGTTCTT	ACCTCCCAAGTGAAATCTTGGT
Gh_A11G0966	AAGAGGGGTGGCAATAACCG	CAGGTGAAGTCAGGGTCGTC
Gh_D11G1117	TTAACCCATCTGGCCGCTTT	CTCCCCAGCCACCATAAGTG
Gh_A08G1067	AATGAGGGTCACCCCGACAA	ATCCGATAGAGCGGCATGTG
Gh_D08G1348	CCAGGGCCATATGTTTGGGT	GACGAGCCCCAAGCTTAGTT
Gh_A04G0603	ATCGGTGGACCTCATGGAGA	GGCCACAACACTCTTTGCTG
Gh_D04G1064	TGACCAGGGTCACATGTTCG	TTTACCGTCAGGCCTCAACC
Gh_D11G3272	ATCCTACGAAGGTGGACCGA	CTTGCACGATACAACGACGG
Gh_A07G1193	AGGTGGACAGGAGTGGATCT	ATAGGAGACCTGCACGAGGC
Gh_A09G1368	GAGGAAATTGGGGCTGGTGA	AGTCGCAAGCACATGGGTTA
cotton GhActin	ATC CTC CGT CTT GAC CTT G	TGT CCG TCA GGC AAC TCA T

## Sheet: Table S3
Table S3. List of primers used for the Y2H experiments
Primer Name	Forward Primer (5` – 3`)	Reverse Primer (5` – 3`)
GhCBL10	ATGGATTCAACTGGCAAAACCC	CCGGAGATAGGAAAGGGCC
GhPRA1B1	ATGGCGTCCCCCGCG	CACGCGAGACGCAAC
GhDSP8	ATGCATATTGAGGAA	ATAAACCCGAATGTC
GhCAB-151	ATGGCAACCTCTGCT	TTTTCCGGGGACAAA
GhSAMS2	ATGGAGACCTTTCTA	AGACTGAGGCTTCTC
GhPYD	ATGGAGAAAACTGAT	AAAAGACTTCTTATG

## Sheet: Table S4
Table S3. Cis-regulatory elements detected within the promoter region of GhSAMS genes
Cis-element	Functions .
GATA-motif	Controls transcriptions dependent to both nitrate and light
TC-rich repeats	Involved in plant defense and stress responsiveness
TATA-box	Jointly with TFs, recruit RNA polymerase, which synthesizes RNA from DNA
As-1 cis-element	Involved in regulations of some gene transcriptional activations
MBSI	Regulates pigmentation and biosynthetic genes regulation of flavonoid
O2 –box site	Influences zein protein synthesis and other metabolism activities
AT-rich cis-element	Serve as transcriptional activators within origins of replication in plants
P-box element	Cis-elements responsive to light stimuli and gibberellins hormones
CAAT-box promotor	DNA transcriptional initiator in responsive to light and gibberellins
MYB-like protein	Cis-regulatory element responsive to gibberellins hormones
GARE-motif	Cis-regulatory element responsive to gibberellins hormones
TATA cis-element	Influences anaerobic induction in the presence of light and CO2
ARE cis-element	Influences anaerobic induction in the presence of light and CO2
Myb-binding site cis-elements	Involved in plant drought response regulatory mechanism
ATCT-motif	Jointly with AE-box confer light responsiveness in the promotor region
AT~TATA-box	Active cis-element site involved in drought-inducibility in plants
TCT-motif	Essential for transcription of ribosomal protein gene promoters & light responsive
WUN-motif	Active cis-element site involved in drought-inducibility in plants
MYB cis-element	Active cis-element site involved in drought-inducibility in plants
MBS cis-element	Active cis-element site involved in drought-inducibility in plants
AC-II cis-element	Involved in lignin biosynthesis & several plant stress responsive elements
Box 4 site	Cis-elements responsive to light stimuli
CGTCA-motif	Active cis-element site involved in the MeJA-responsiveness in plants
TGACG-motif	Active cis-element site involved in the MeJA-responsiveness in plants
MSA-like cis-element	Involved in the regulation cell cycle in plants
AT1-motif site	Binds AT-rich DNA sequences related to the nuclear MARs
TGA cis-element	involved plant responses related to auxin hormone
ERE cis-element	Active cis-element site that regulates the expression of meristems
MYB recognition	Active cis-element site that regulates the expression of meristems
CAT-box	Active cis-element site that regulates the expression of meristems
